# Supplementary material for: The Computerized Medical Record as a Tool for Clinical Governance in Australian Primary Care
Source: PubMed Central journal article supplement (PMC3744386; doi:10.2196/ijmr.2700), 2013-08-12
Supplement: ijmr_v2i2e26_app1.pdf [file ijmr_v2i2e26_app1.pdf]

| STRUCTURES                                                           |                                                        | Individual clinician<br><i>Their knowledge of, skill in operation &amp; attitudes towards EPR use for governance</i> | Clinical task<br><i>Usually the 1 to 1 clinical consultation – may involve implementing guidelines</i> | Technology<br><i>With its primary &amp; secondary roles – compare available technology with list<br/>Secondary roles may include pay-for-performance</i> | Organisation<br><i>Practice, Locality, Region, and National drivers/priorities</i> |
|----------------------------------------------------------------------|--------------------------------------------------------|----------------------------------------------------------------------------------------------------------------------|--------------------------------------------------------------------------------------------------------|----------------------------------------------------------------------------------------------------------------------------------------------------------|------------------------------------------------------------------------------------|
| <b>System architecture</b>                                           | Interface (GUI, CHUI etc.)                             |                                                                                                                      |                                                                                                        |                                                                                                                                                          |                                                                                    |
|                                                                      | Clinical archetypes                                    |                                                                                                                      |                                                                                                        |                                                                                                                                                          |                                                                                    |
|                                                                      | Database (closed, restricted, open API – Local/Hosted) |                                                                                                                      |                                                                                                        |                                                                                                                                                          |                                                                                    |
|                                                                      | Coding system                                          |                                                                                                                      |                                                                                                        |                                                                                                                                                          |                                                                                    |
|                                                                      | Recalls (set/free)                                     |                                                                                                                      |                                                                                                        |                                                                                                                                                          |                                                                                    |
|                                                                      | Shared record capability                               |                                                                                                                      |                                                                                                        |                                                                                                                                                          |                                                                                    |
|                                                                      | Audit trail                                            |                                                                                                                      |                                                                                                        |                                                                                                                                                          |                                                                                    |
|                                                                      | Attribution                                            |                                                                                                                      |                                                                                                        |                                                                                                                                                          |                                                                                    |
|                                                                      | Security, back-up, system recovery, service support    |                                                                                                                      |                                                                                                        |                                                                                                                                                          |                                                                                    |
| <b>Information support</b>                                           | Information retrieval system                           |                                                                                                                      |                                                                                                        |                                                                                                                                                          |                                                                                    |
|                                                                      | Drug information database                              |                                                                                                                      |                                                                                                        |                                                                                                                                                          |                                                                                    |
|                                                                      | Guidelines                                             |                                                                                                                      |                                                                                                        |                                                                                                                                                          |                                                                                    |
|                                                                      | Clinical information                                   |                                                                                                                      |                                                                                                        |                                                                                                                                                          |                                                                                    |
|                                                                      | Types                                                  |                                                                                                                      |                                                                                                        |                                                                                                                                                          |                                                                                    |
|                                                                      | Source (internal/external)                             |                                                                                                                      |                                                                                                        |                                                                                                                                                          |                                                                                    |
|                                                                      | Clinical decision support                              |                                                                                                                      |                                                                                                        |                                                                                                                                                          |                                                                                    |
|                                                                      | Drug/drug interactions                                 |                                                                                                                      |                                                                                                        |                                                                                                                                                          |                                                                                    |
|                                                                      | Drug/condition interactions                            |                                                                                                                      |                                                                                                        |                                                                                                                                                          |                                                                                    |
|                                                                      | Drug adverse reaction                                  |                                                                                                                      |                                                                                                        |                                                                                                                                                          |                                                                                    |
|                                                                      | Warfarin dosage                                        |                                                                                                                      |                                                                                                        |                                                                                                                                                          |                                                                                    |
|                                                                      | Immunisation                                           |                                                                                                                      |                                                                                                        |                                                                                                                                                          |                                                                                    |
|                                                                      | Clinical                                               |                                                                                                                      |                                                                                                        |                                                                                                                                                          |                                                                                    |
| <b>System linkage (and if to national / international standards)</b> | Patients                                               |                                                                                                                      |                                                                                                        |                                                                                                                                                          |                                                                                    |
|                                                                      | Registration database                                  |                                                                                                                      |                                                                                                        |                                                                                                                                                          |                                                                                    |
|                                                                      | Unique ID                                              |                                                                                                                      |                                                                                                        |                                                                                                                                                          |                                                                                    |
|                                                                      | Laboratory                                             |                                                                                                                      |                                                                                                        |                                                                                                                                                          |                                                                                    |
|                                                                      | Imaging                                                |                                                                                                                      |                                                                                                        |                                                                                                                                                          |                                                                                    |
|                                                                      | Clinic                                                 |                                                                                                                      |                                                                                                        |                                                                                                                                                          |                                                                                    |
|                                                                      | In-patients                                            |                                                                                                                      |                                                                                                        |                                                                                                                                                          |                                                                                    |
|                                                                      | Email & Web                                            |                                                                                                                      |                                                                                                        |                                                                                                                                                          |                                                                                    |
|                                                                      | Referral                                               |                                                                                                                      |                                                                                                        |                                                                                                                                                          |                                                                                    |
|                                                                      | Others                                                 |                                                                                                                      |                                                                                                        |                                                                                                                                                          |                                                                                    |

| <b>STRUCTURES</b>                            |                                                                            | <b>Individual clinician</b><br><i>Their knowledge of, skill in operation &amp; attitudes towards EPR use for governance</i> | <b>Clinical task</b><br><i>Usually the 1 to 1 clinical consultation – may involve implementing guidelines</i> | <b>Technology</b><br><i>With its primary &amp; secondary roles – compare available technology with list<br/>Secondary roles may include pay-for-performance</i> | <b>Organisation</b><br><i>Practice, Locality, Region, and National drivers/priorities</i> |
|----------------------------------------------|----------------------------------------------------------------------------|-----------------------------------------------------------------------------------------------------------------------------|---------------------------------------------------------------------------------------------------------------|-----------------------------------------------------------------------------------------------------------------------------------------------------------------|-------------------------------------------------------------------------------------------|
| <b>Search function</b>                       | Population                                                                 |                                                                                                                             |                                                                                                               |                                                                                                                                                                 |                                                                                           |
|                                              | Practice                                                                   |                                                                                                                             |                                                                                                               |                                                                                                                                                                 |                                                                                           |
|                                              | Linked data                                                                |                                                                                                                             |                                                                                                               |                                                                                                                                                                 |                                                                                           |
|                                              | Export functionality – and common interlink formats                        |                                                                                                                             |                                                                                                               |                                                                                                                                                                 |                                                                                           |
|                                              | Others                                                                     |                                                                                                                             |                                                                                                               |                                                                                                                                                                 |                                                                                           |
| <b>Patient access / control</b>              |                                                                            |                                                                                                                             |                                                                                                               |                                                                                                                                                                 |                                                                                           |
|                                              | Access to record (Read only)                                               |                                                                                                                             |                                                                                                               |                                                                                                                                                                 |                                                                                           |
|                                              | Add to record (Write)                                                      |                                                                                                                             |                                                                                                               |                                                                                                                                                                 |                                                                                           |
|                                              | Ownership of record (Control access)                                       |                                                                                                                             |                                                                                                               |                                                                                                                                                                 |                                                                                           |
|                                              | Access to pooled quality data                                              |                                                                                                                             |                                                                                                               |                                                                                                                                                                 |                                                                                           |
|                                              | Others                                                                     |                                                                                                                             |                                                                                                               |                                                                                                                                                                 |                                                                                           |
| <b>PROCESSES</b>                             |                                                                            |                                                                                                                             |                                                                                                               |                                                                                                                                                                 |                                                                                           |
| <b>Quality markers</b>                       |                                                                            |                                                                                                                             |                                                                                                               |                                                                                                                                                                 |                                                                                           |
|                                              | Denominator quality                                                        |                                                                                                                             |                                                                                                               |                                                                                                                                                                 |                                                                                           |
|                                              | Data quality                                                               |                                                                                                                             |                                                                                                               |                                                                                                                                                                 |                                                                                           |
|                                              | Clinical quality – participation in audit – practice / locality / national |                                                                                                                             |                                                                                                               |                                                                                                                                                                 |                                                                                           |
|                                              | Fitness for practice – Appraisal / validation                              |                                                                                                                             |                                                                                                               |                                                                                                                                                                 |                                                                                           |
|                                              | Complaints                                                                 |                                                                                                                             |                                                                                                               |                                                                                                                                                                 |                                                                                           |
|                                              | Accreditation (of the system)                                              |                                                                                                                             |                                                                                                               |                                                                                                                                                                 |                                                                                           |
|                                              | Training (of the users and their supervisors – e.g. Caldicott guardian)    |                                                                                                                             |                                                                                                               |                                                                                                                                                                 |                                                                                           |
| <b>Billing pay for Performance</b>           |                                                                            |                                                                                                                             |                                                                                                               |                                                                                                                                                                 |                                                                                           |
|                                              | Routine data used for pay for performance                                  |                                                                                                                             |                                                                                                               |                                                                                                                                                                 |                                                                                           |
|                                              | Local                                                                      |                                                                                                                             |                                                                                                               |                                                                                                                                                                 |                                                                                           |
|                                              | National                                                                   |                                                                                                                             |                                                                                                               |                                                                                                                                                                 |                                                                                           |
|                                              | Separate billing process data                                              |                                                                                                                             |                                                                                                               |                                                                                                                                                                 |                                                                                           |
|                                              | Perverse incentives                                                        |                                                                                                                             |                                                                                                               |                                                                                                                                                                 |                                                                                           |
| <b>Epidemiology /Health needs assessment</b> |                                                                            |                                                                                                                             |                                                                                                               |                                                                                                                                                                 |                                                                                           |
|                                              | Epidemiology / sentinel networks                                           |                                                                                                                             |                                                                                                               |                                                                                                                                                                 |                                                                                           |
|                                              | Health service management / needs assessment                               |                                                                                                                             |                                                                                                               |                                                                                                                                                                 |                                                                                           |
|                                              | Safety and surveillance                                                    |                                                                                                                             |                                                                                                               |                                                                                                                                                                 |                                                                                           |
| <b>OUTCOMES</b>                              |                                                                            |                                                                                                                             |                                                                                                               |                                                                                                                                                                 |                                                                                           |
| 1)                                           | <b>Surrogate markers of quality</b>                                        |                                                                                                                             |                                                                                                               |                                                                                                                                                                 |                                                                                           |
| 2)                                           | <b>Critical Incident Reporting</b>                                         |                                                                                                                             |                                                                                                               |                                                                                                                                                                 |                                                                                           |
| 3)                                           | <b>Outcome markers</b>                                                     |                                                                                                                             |                                                                                                               |                                                                                                                                                                 |                                                                                           |
|                                              |                                                                            |                                                                                                                             |                                                                                                               |                                                                                                                                                                 |                                                                                           |
|                                              |                                                                            |                                                                                                                             |                                                                                                               |                                                                                                                                                                 |                                                                                           |
|                                              |                                                                            |                                                                                                                             |                                                                                                               |                                                                                                                                                                 |                                                                                           |
|                                              |                                                                            |                                                                                                                             |                                                                                                               |                                                                                                                                                                 |                                                                                           |
|                                              |                                                                            |                                                                                                                             |                                                                                                               |                                                                                                                                                                 |                                                                                           |
|                                              |                                                                            |                                                                                                                             |                                                                                                               |                                                                                                                                                                 |                                                                                           |
|                                              |                                                                            |                                                                                                                             |                                                                                                               |                                                                                                                                                                 |                                                                                           |
|                                              |                                                                            |                                                                                                                             |                                                                                                               |                                                                                                                                                                 |                                                                                           |
